# Supplementary material for: Tertiary Epimutations – A Novel Aspect of Epigenetic Transgenerational Inheritance Promoting Genome Instability
Source: PubMed Central journal article supplement (PMC5167269; doi:10.1371/journal.pone.0168038), 2016-12-19
Supplement: pone.0168038.s001.pdf [file pone.0168038.s001.pdf]

**Tertiary Epimutations – A Novel Aspect of Epigenetic Transgenerational Inheritance  
Promoting Genome Instability**

John R. McCarrey\*, Jake D. Lehle, Seetha S. Raju, Yufeng Wang,  
Eric E. Nilsson, and Michael K. Skinner

**Supplementary Information – Table S1**

**\*Correspondence:** John R. McCarrey  
Department of Biology  
University of Texas at San Antonio  
San Antonio, TX, 78249  
Email: [John.McCarrey@utsa.edu](mailto:John.McCarrey@utsa.edu)  
Phone: 210-458-4507

**Table S1. Individual Mutations**

| <b>F1 Generation Samples</b> | <b>Position of Mutation in <i>lacI</i> Gene*</b> | <b>Type of Mutation</b> |
|------------------------------|--------------------------------------------------|-------------------------|
| F1CLK1                       | 92                                               | C > T                   |
|                              | 116                                              | G > T                   |
|                              | 136                                              | T INSERT                |
|                              | 180                                              | G DEL                   |
|                              | 180                                              | G > A                   |
|                              | 381                                              | G > A                   |
|                              | 759                                              | T DEL                   |
|                              | 760                                              | T DEL                   |
| F1CLK2                       | 57                                               | C > T                   |
|                              | 135                                              | A DEL                   |
|                              | 185                                              | C INSERT                |
|                              | 234                                              | C DEL                   |
|                              | 702                                              | G > A                   |
|                              | 795                                              | C > A                   |
| F1VLK1                       | 42                                               | C > T                   |
|                              | 95                                               | G > A                   |
|                              | 179                                              | C > T                   |
|                              | 180                                              | G > A                   |
|                              | 760                                              | T DEL                   |
|                              | 882                                              | C > T                   |
| F1VLK2                       | 131                                              | C > T                   |
|                              | 135                                              | A DEL                   |
|                              | 198                                              | C > T                   |
|                              | 269                                              | G > A                   |
|                              | 318                                              | C > A                   |
|                              | 701                                              | G > C                   |
| F1CLS1                       | 57                                               | C > A                   |
|                              | 329                                              | C > T                   |
|                              | 539                                              | G DEL                   |
|                              | 620-623                                          | CTGG DEL                |
|                              | 917                                              | G > A                   |
| F1CLS3                       | 198                                              | C > T                   |
|                              | 607                                              | G DEL                   |
|                              | 760                                              | T DEL                   |
|                              | 888-889                                          | CC > TT                 |
|                              | 918                                              | G > A                   |
| F1CLS4                       | 57                                               | C > T                   |
|                              | 87                                               | T DEL                   |
|                              | 92                                               | C > T                   |
|                              | 93                                               | G > A                   |

|        |         |            |
|--------|---------|------------|
|        | 116     | G > T      |
|        | 129     | C > A      |
|        | 759     | T DEL      |
|        | 760     | T DEL      |
|        | 843     | G > A      |
| F1CLS5 | 91-92   | CC > TT    |
|        | 93      | G > A      |
|        | 293     | C > T      |
|        | 518     | G > T      |
|        | 857     | G > T      |
|        | 955     | G > C      |
| F1VLS1 | 179     | C > T      |
|        | 270     | C > T      |
|        | 329     | C > T      |
|        | 687-688 | GG > AA    |
|        | 760     | T DEL      |
|        | 803     | G > T      |
|        | 894     | T > A      |
|        | 995     | C > T      |
|        | 1204    | C > T      |
| F1VLS2 | 35      | C DEL      |
|        | 56      | G > A      |
|        | 92      | C > T      |
|        | 95      | G > A      |
|        | 610-615 | GCGTCT DEL |
|        | 665     | A INSERT   |
|        | 760     | T DEL      |

| F3 Generation Samples | Position of Mutation in <i>lacI</i> Gene* | Type of Mutation |
|-----------------------|-------------------------------------------|------------------|
| F3CLK1                | 81                                        | A > C            |
|                       | 92                                        | C > T            |
|                       | 153                                       | T > C            |
|                       | 173                                       | C DEL            |
|                       | 436-437                                   | GG > TT          |
|                       | 792                                       | G > A            |
|                       | 847                                       | C > A            |
|                       | 850                                       | C DEL            |
| F3CLK2                | 32                                        | A DEL            |
|                       | 68                                        | G > T            |
|                       | 69                                        | G > T            |
|                       | 80                                        | C > T            |
|                       | 120                                       | C > G            |
|                       | 125                                       | A DEL            |
|                       | 348                                       | G DEL            |

|        |           |           |
|--------|-----------|-----------|
|        | 386       | A DEL     |
|        | 388       | T DEL     |
|        | 453-454   | AT DEL    |
|        | 503       | A DEL     |
|        | 544       | G DEL     |
|        | 620-623   | CTGG DEL  |
|        | 696       | T DEL     |
|        | 791       | C > T     |
|        | 834       | C > A     |
|        | 842-843   | GG > AA   |
|        | 865       | C DEL     |
|        | 968       | A DEL     |
|        | 1001-1002 | AA DEL    |
| F3CLK3 | 75        | C > T     |
|        | 125       | A DEL     |
|        | 131       | C > T     |
|        | 350       | A DEL     |
|        | 354-384   | 31 BP DEL |
|        | 542       | G DEL     |
|        | 565       | C DEL     |
|        | 703       | T DEL     |
|        | 747       | C > T     |
|        | 968       | A DEL     |
| F3CLK4 | 83        | A > G     |
|        | 203       | A DEL     |
|        | 306       | G DEL     |
|        | 308       | G > A     |
|        | 329       | C DEL     |
|        | 381       | G > A     |
|        | 430       | T DEL     |
|        | 488       | A DEL     |
|        | 613       | T DEL     |
|        | 703       | T DEL     |
|        | 791       | C > T     |
|        | 936       | G > C     |
|        | 947-948   | CT DEL    |
|        | 968       | A DEL     |
| F3CLK6 | 44        | T > G     |
|        | 95        | G > A     |
|        | 329       | C > T     |
|        | 331       | A DEL     |
|        | 452       | A DEL     |
|        | 564       | A DEL     |
|        | 838       | A DEL     |
|        | 868-870   | ATG DEL   |
|        | 1006      | A DEL     |
| F3CLK7 | 72        | T > C     |
|        | 95        | G > A     |
|        | 132       | G DEL     |

|        |         |             |
|--------|---------|-------------|
|        | 164     | A DEL       |
|        | 273     | C > A       |
|        | 327     | A DEL       |
|        | 329     | C > T       |
|        | 511-512 | CT DEL      |
|        | 559     | G DEL       |
|        | 615     | T DEL       |
|        | 858     | A DEL       |
|        | 865-866 | CT DEL      |
|        | 894     | T > G       |
|        | 968     | A DEL       |
|        | 1011    | C > A       |
| F3VLK1 | 91-92   | CC > TT     |
|        | 157     | G DEL       |
|        | 388     | T DEL       |
|        | 488     | A DEL       |
|        | 512     | T DEL       |
|        | 671     | G > T       |
|        | 759     | T DEL       |
|        | 904     | T DEL       |
|        | 968     | A DEL       |
| F3VLK2 | 31      | G DEL       |
|        | 80      | C > T       |
|        | 93      | G > A       |
|        | 153     | T DEL       |
|        | 186     | C > A       |
|        | 270     | C > T       |
|        | 342     | A DEL       |
|        | 421     | G DEL       |
|        | 478     | C DEL       |
|        | 561-567 | GTCACCA DEL |
|        | 575     | G > C       |
|        | 592     | A DEL       |
|        | 678     | A DEL       |
|        | 720     | A DEL       |
|        | 881-882 | CC > TT     |
|        | 899     | C > T       |
|        | 901     | G DEL       |
|        | 904     | T DEL       |
|        | 953     | C > T       |
|        | 959     | C > T       |
|        | 968     | A DEL       |
|        | 1205    | C > T       |
| F3VLK3 | 144     | A DEL       |
|        | 256     | G DEL       |
|        | 388     | T DEL       |
|        | 647     | C > T       |
|        | 654     | A DEL       |
| F3VLK4 | 27      | A DEL       |

|        |         |         |
|--------|---------|---------|
|        | 56      | G > A   |
|        | 87      | T DEL   |
|        | 120     | C > G   |
|        | 140     | G > A   |
|        | 179     | C > T   |
|        | 194     | C > G   |
|        | 198     | C > T   |
|        | 293     | C > T   |
|        | 369     | T DEL   |
|        | 388     | T DEL   |
|        | 406     | T DEL   |
|        | 441     | C DEL   |
|        | 471     | T DEL   |
|        | 488     | A DEL   |
|        | 522     | A DEL   |
|        | 795-796 | CC > AA |
|        | 868-870 | ATG DEL |
|        | 882     | C > T   |
|        | 909     | G DEL   |
|        | 951     | C > T   |
|        | 953     | C > T   |
|        | 968     | A DEL   |
| F3VLK5 | 15      | T DEL   |
|        | 34      | G > C   |
|        | 52      | T DEL   |
|        | 56      | G > A   |
|        | 76      | T DEL   |
|        | 81      | A > G   |
|        | 174     | C > T   |
|        | 231     | C DEL   |
|        | 487     | G DEL   |
|        | 788     | A DEL   |
|        | 869     | T > C   |
|        | 904     | T DEL   |
|        | 968     | A DEL   |
| F3VLK6 | 38      | G > C   |
|        | 115     | C DEL   |
|        | 231     | C DEL   |
|        | 324     | T DEL   |
|        | 371     | C DEL   |
|        | 388     | T > G   |
|        | 471     | T DEL   |
|        | 746     | A DEL   |
|        | 904     | T DEL   |
| F3VLK7 | 26      | A DEL   |
|        | 42      | C > T   |
|        | 50      | G > T   |
|        | 80      | C > G   |
|        | 84-85   | CC > TT |

|         |         |           |
|---------|---------|-----------|
|         | 92      | C > G     |
|         | 102-122 | 21 BP DEL |
|         | 122-123 | GC DEL    |
|         | 132     | G DEL     |
|         | 213     | T DEL     |
|         | 231     | C DEL     |
|         | 247-248 | GC DEL    |
|         | 317     | T > C     |
|         | 491     | C DEL     |
|         | 581     | T DEL     |
|         | 720     | A DEL     |
|         | 803     | G > A     |
|         | 828     | A DEL     |
|         | 868-869 | AT DEL    |
|         | 881     | C > T     |
|         | 881     | C DEL     |
|         | 883     | G > A     |
|         | 968     | A DEL     |
| F3VLK8  | 44      | T > G     |
|         | 203     | A DEL     |
|         | 371     | C DEL     |
|         | 381     | G > A     |
|         | 512     | T DEL     |
|         | 517     | T DEL     |
|         | 575     | G > C     |
|         | 809     | G DEL     |
|         | 904     | T DEL     |
| F3VLK9  | 79      | T DEL     |
|         | 258     | C > A     |
|         | 452     | A DEL     |
|         | 488     | A DEL     |
|         | 791     | C > T     |
|         | 886     | A > T     |
| F3VLK10 | 144     | A DEL     |
|         | 338     | G DEL     |
|         | 467     | T DEL     |
|         | 735     | G DEL     |
|         | 757     | G DEL     |
|         | 759     | T DEL     |
|         | 904     | T DEL     |
|         | 938     | T DEL     |
| F3CLS1  | 49      | C > A     |
|         | 56      | G > A     |
|         | 86      | G > T     |
|         | 95      | G > A     |
|         | 264     | A INSERT  |
|         | 270     | C > T     |
|         | 318     | C > A     |
|         | 588     | G > T     |

|        |           |          |
|--------|-----------|----------|
|        | 759       | T DEL    |
|        | 760       | T DEL    |
| F3CLS2 | 93        | G > A    |
|        | 120       | A INSERT |
|        | 179       | C > T    |
|        | 192       | A DEL    |
|        | 198       | C > T    |
|        | 221       | G > T    |
|        | 620 - 623 | CTGG DEL |
|        | 759       | T DEL    |
|        | 760       | T DEL    |
|        | 761       | G DEL    |
|        | 803       | G > T    |
| F3CLS3 | 92        | C > T    |
|        | 228       | C DEL    |
|        | 341       | G > T    |
|        | 620-623   | CTGG DEL |
|        | 760       | T DEL    |
|        | 920       | C > T    |
|        | 959       | C > T    |
| F3VLS1 | 93        | G > A    |
|        | 95        | G > A    |
|        | 329       | C > T    |
|        | 628       | C DEL    |
|        | 759       | T DEL    |
|        | 760       | T DEL    |
|        | 959       | C > T    |
| F3VLS2 | 72        | T > C    |
|        | 179       | C > T    |
|        | 633       | A DEL    |
|        | 681       | G > A    |
|        | 760       | T DEL    |
|        | 761       | G DEL    |
|        | 784       | C DEL    |
|        | 882       | C > T    |
| F3VLS4 | 34        | G > C    |
|        | 42        | C > T    |
|        | 329       | C > T    |
|        | 331       | A DEL    |
|        | 491       | C DEL    |
|        | 681       | G > A    |
|        | 843       | G > A    |
| F3VLS5 | 42        | C > T    |
|        | 84-85     | CC > TT  |
|        | 140       | G > A    |
|        | 174       | C > T    |
|        | 180       | G DEL    |
|        | 760       | T DEL    |
|        | 770       | C > T    |



|        |         |         |
|--------|---------|---------|
|        | 920     | C > T   |
| F3VLS6 | 178-179 | CC > TT |
|        | 270     | C > T   |
|        | 667     | A > T   |
|        | 667     | A DEL   |
|        | 760     | T DEL   |
|        | 882     | C > T   |
| F3VLS7 | 557     | A INS   |
|        | 692     | G DEL   |
|        | 708     | A DEL   |
|        | 760     | T DEL   |
|        | 888     | C > T   |
|        | 993     | C > A   |

\*[Based on Big Blue Transgenic Rodent Mutagenesis Assay System Instruction Manual from Stratagene, p.26]
